# Supplementary material
Source: publisher site journal article supplement (https://www.dovepress.com/article/supplementary_file/576500/576500%20Supplementary%20Figures.docx)
Supplement: Supplementary file 1 [file 576500%20Supplementary%20Figures.docx]

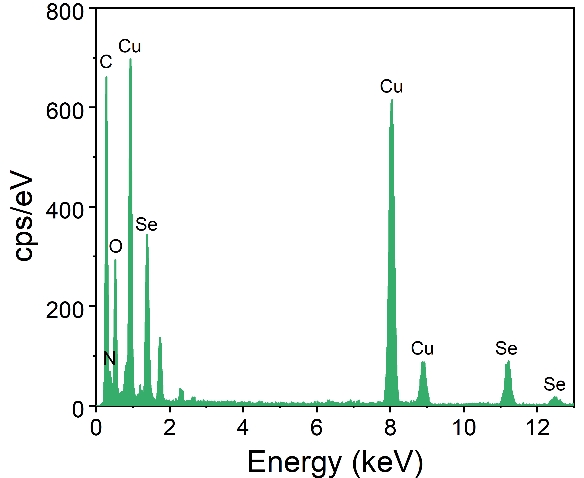


**Figure S1** EDX survey spectrum of Cu2-xSe.

| A  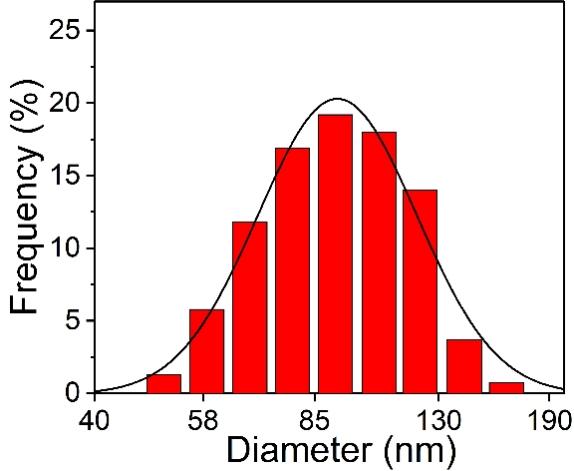 |
| --- |
| B  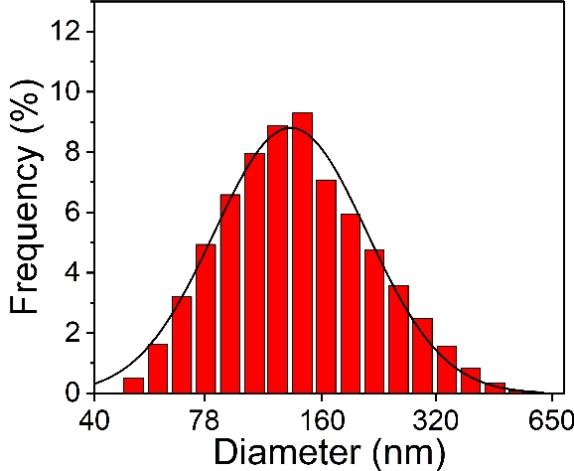 |

**Figure S2** Size distributions of Cu2-xSe nanoparticles (**A**) and Cu2-xSe/PDA/IR820 nanoparticles (**B**), with average hydrodynamic diameters of 98.96 ± 0.64 nm and 164.11 ± 1.81 nm, respectively.


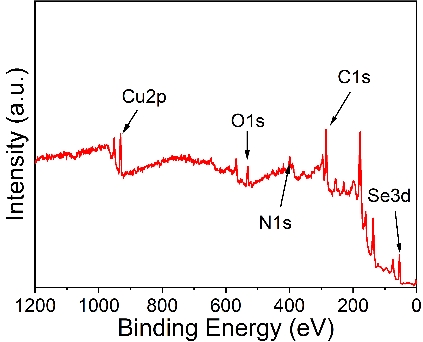


**Figure S3** XPS spectrum of Cu2-xSe/PDA/IR820.


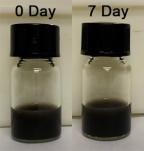


**Figure S4** Comparison of the stability images of composite nanoparticles on day 0 and day 7.

| A  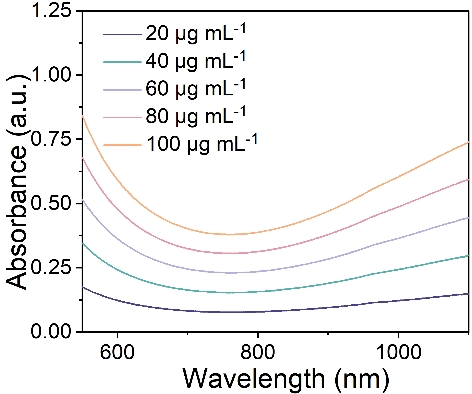 |
| --- |
| B  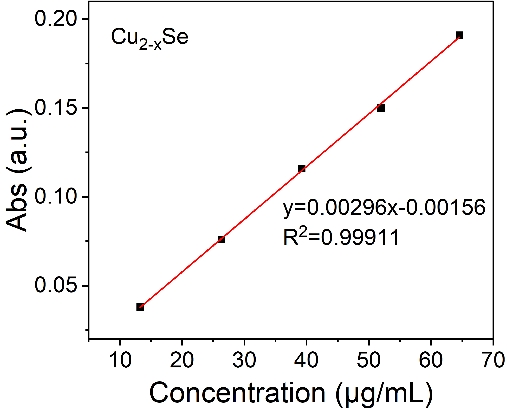 |

**Figure S5** UV absorption curves of different concentrations of Cu2-xSe (**A**) and absorbance fitting curve at 808 nm (**B**).

| A  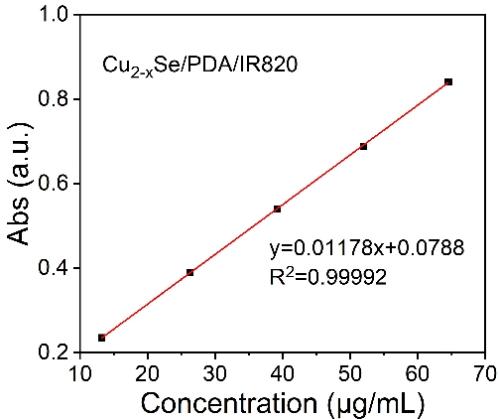 |
| --- |
| B  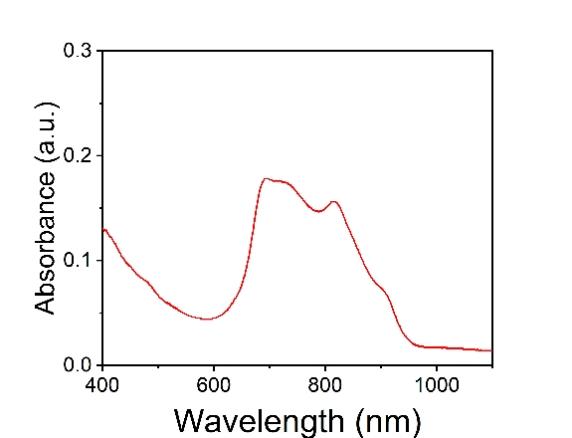 |

**Figure S6** (**A**) Absorbance fitting curves of Cu2-xSe/PDA/IR820 at different concentrations. (**B**) UV–vis absorption spectrum of Cu2-xSe/PDA/IR820 composite nanoparticles at 1 mg/mL.

| A  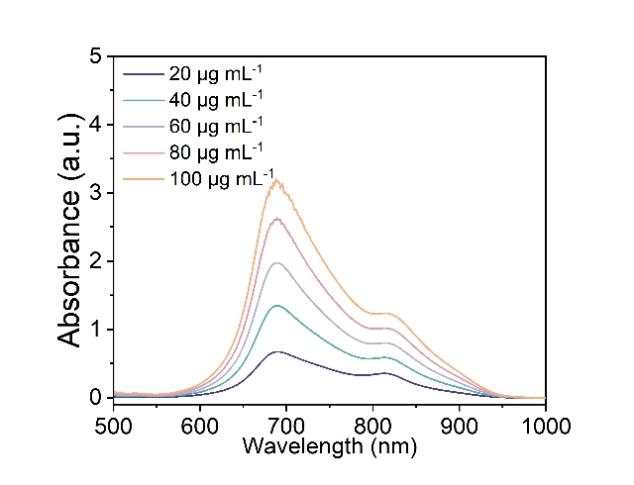 |
| --- |
| B  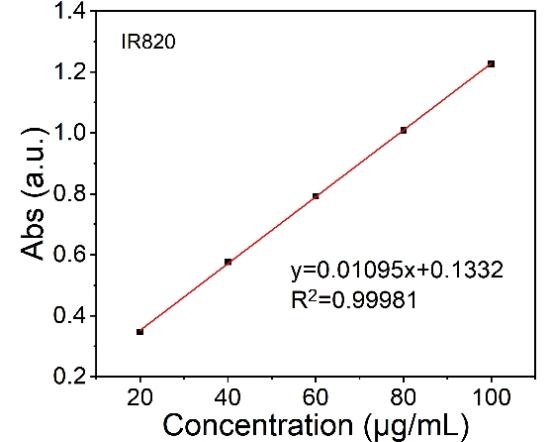 |

**Figure S7** UV–vis absorption spectra of IR820 at different concentrations (**A**) and the corresponding standard curve (**B**).

| A  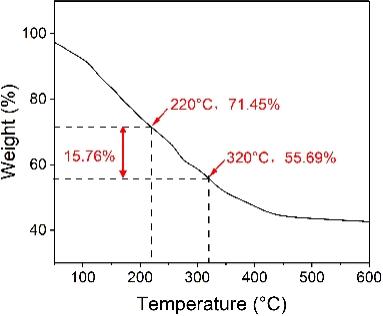 | B 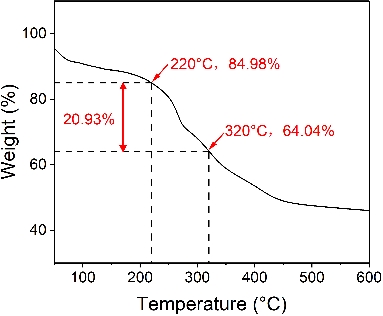 | C 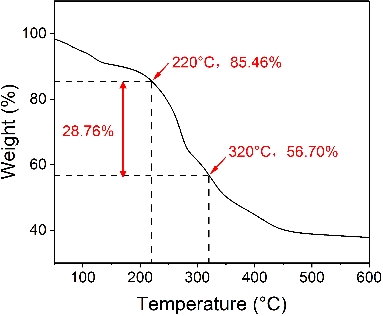 |  |  |
| --- | --- | --- | --- | --- |

**Figure S8** The TGA of Cu2-xSe/PDA/IR820 composite nanoparticles after exposure to simulated tumor microenvironment conditions for 10 min (**A**), 20 min (**B**) and 30 min (**C**).


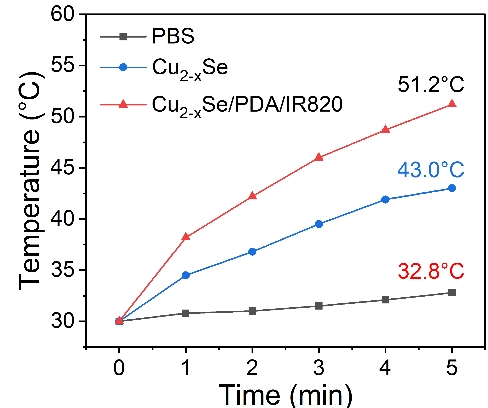


**Figure S9** Thermal image-based temperature profiles of PBS, Cu2-xSe, and Cu2-xSe/PDA/IR820 composite nanoparticles.


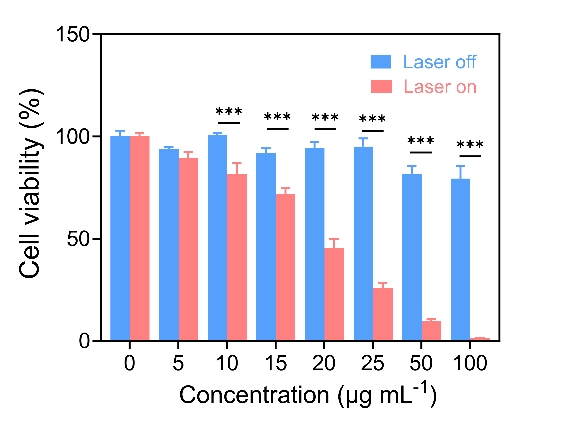


**Figure S10** Plot of cell survival after 6 h of co-incubation of KYSE150 with Cu2-xSe/PDA/IR820 in the presence or absence of light. (Data are expressed as mean ± SD, n = 3, ***p < 0.001.)

| A  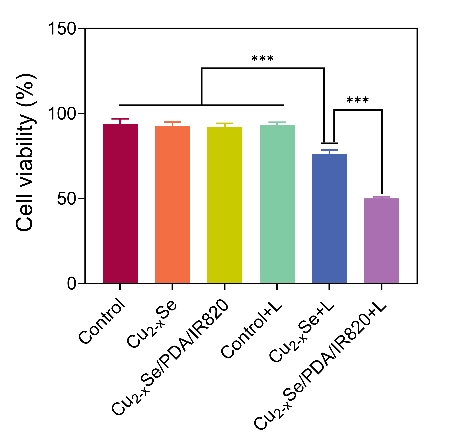 | B  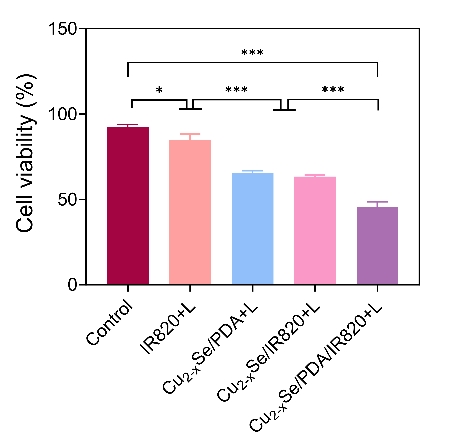 |
| --- | --- |

**Figure S11** Survival of KYSE150 under different treatment conditions with the same material concentration(**A**) and additional subgroup control experiments for cytotoxicity assessment (**B**). (Data are expressed as mean ± SD, n = 3, ***p < 0.001, *p < 0.05.)


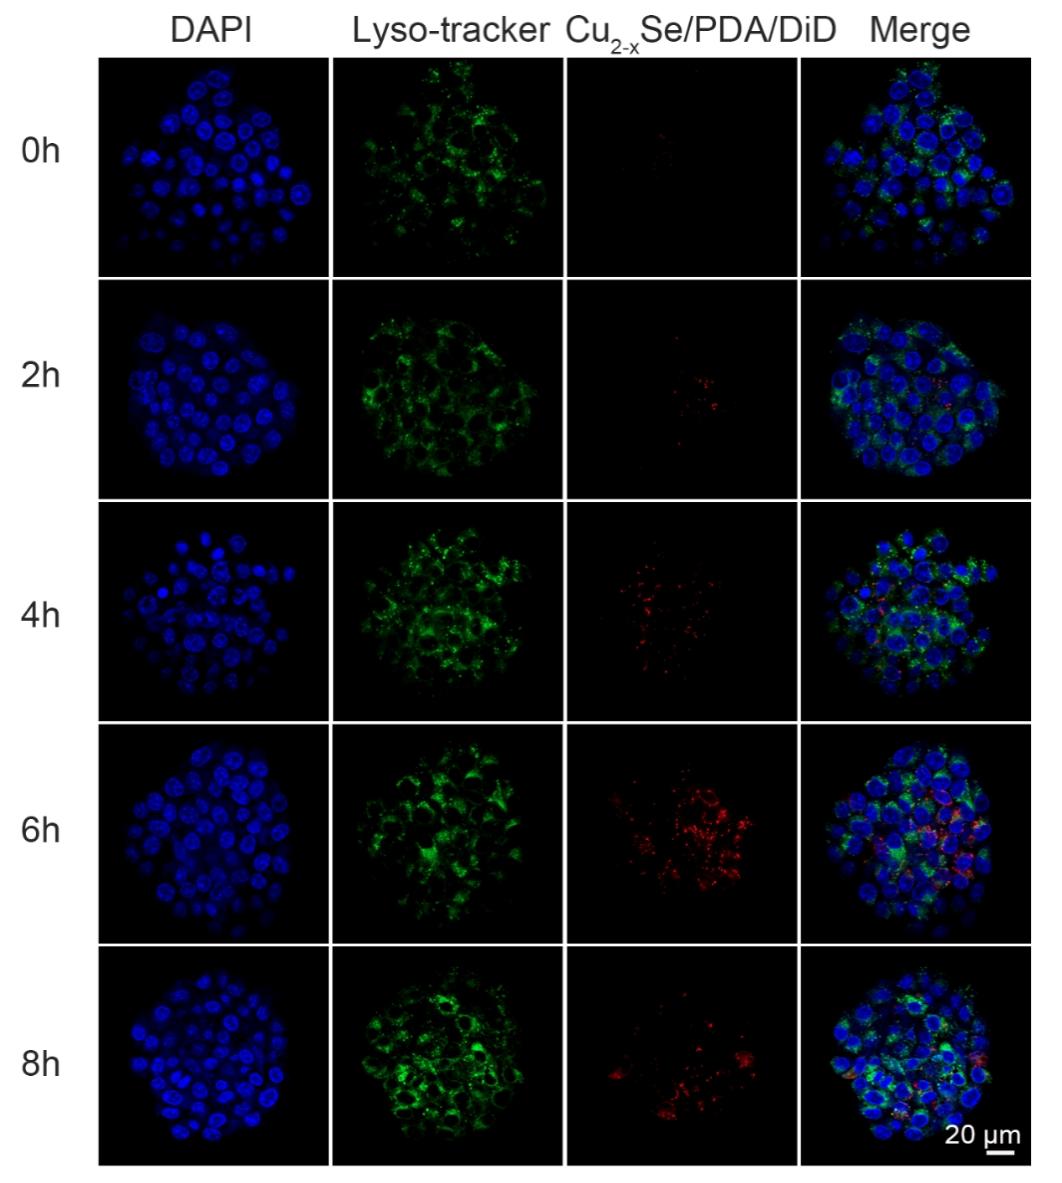


**Figure S12** Confocal laser scanning microscopy images showing the time-dependent uptake of the material by HUVEC cells. Scale bar = 20 μm.


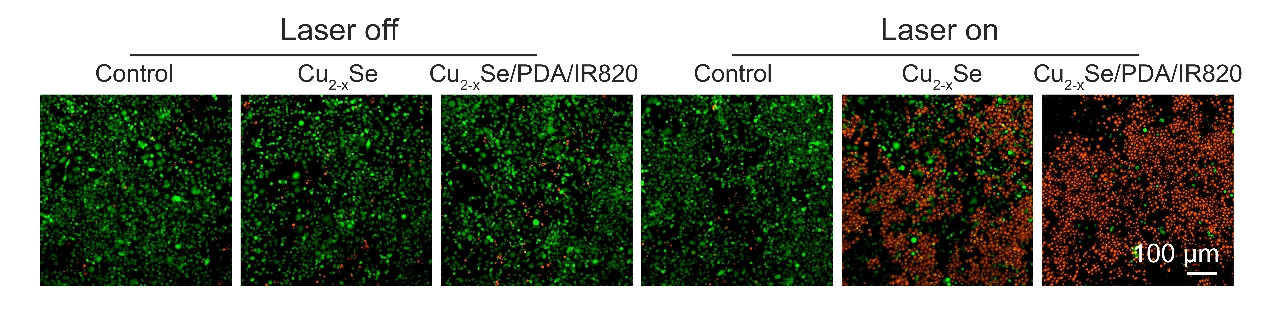


**Figure S13** Confocal laser scanning microscopy images of live/dead-stained HUVEC cells. Scale bar = 100 μm.


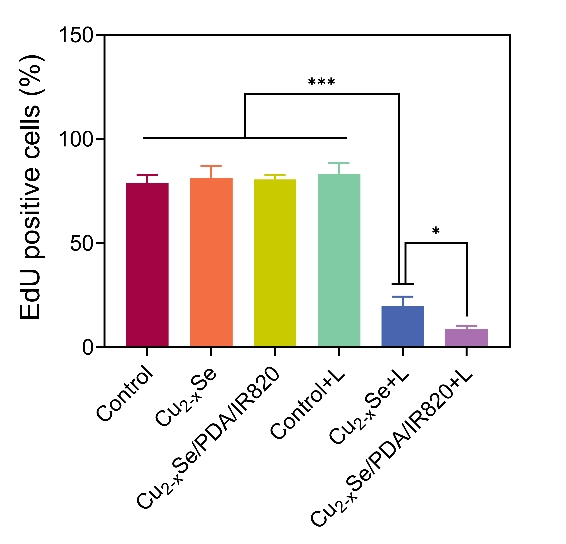


**Figure S14** Quantitative graph of EdU proliferation assay of KYSE150 under different treatment conditions. (Data are expressed as mean ± SD, n = 3, ***p < 0.001, *p < 0.05.)

A
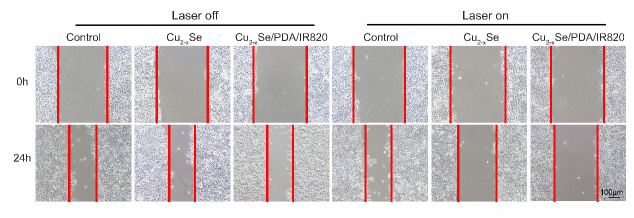


B


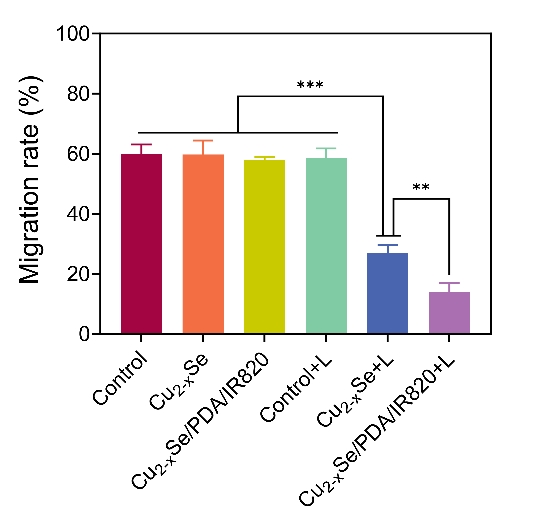


**Figure S15** Quantitative analyses of the migration capacity (**A**) and (**B**) migration of KYSE150 for 24h after different treatments. The red vertical lines represent the cell boundaries in the wound healing assay. Scale bar = 100 μm. (Data are expressed as mean ± SD, n = 3, ***p < 0.001, **p < 0.01.)

A


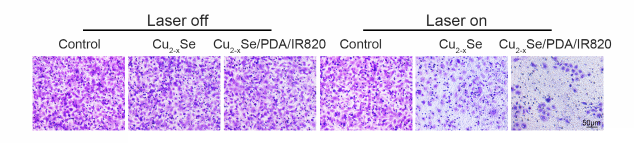


B


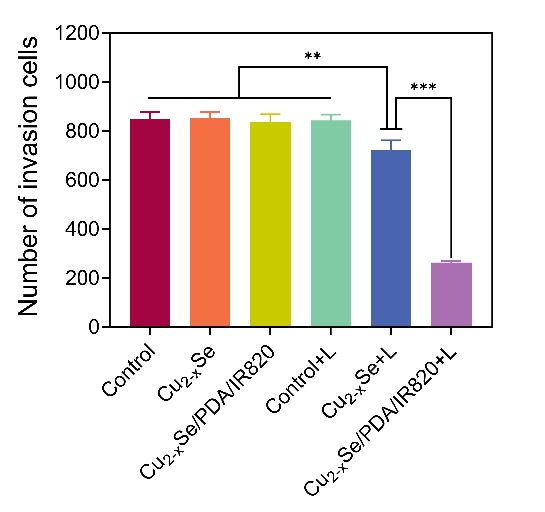


**Figure S16** Cell invasion images (**A**) and (**B**) quantitative plots of KYSE150 cells under different treatment conditions. Scale bar = 50 μm. (Data are expressed as mean ± SD, n = 3, ***p < 0.001, **p < 0.01.)

A


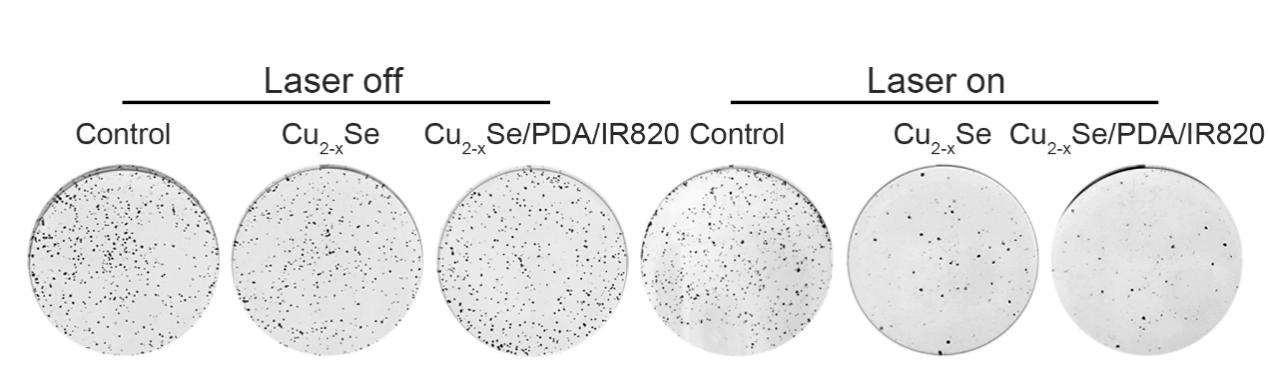


B


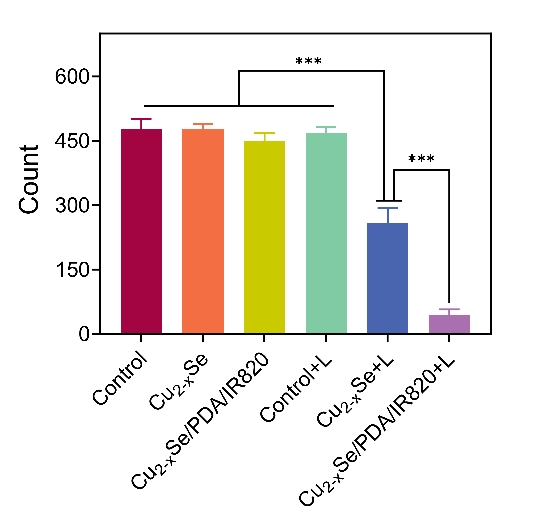


**Figure S17** Clone formation of KYSE150 after different treatments (**A**) and quantitative analysis of the number of clones formed (**B**). (Data are expressed as mean ± SD, n = 3, ***p < 0.001.)


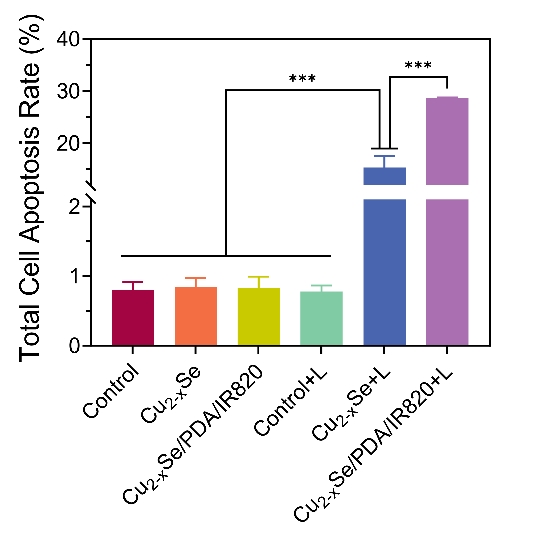


**Figure S18** Quantitative flow cytometry analysis of KYSE150 stained with membrane-bound protein V-FITC/PI. (Data are expressed as mean ± SD, n = 3, ***p < 0.001.)

A


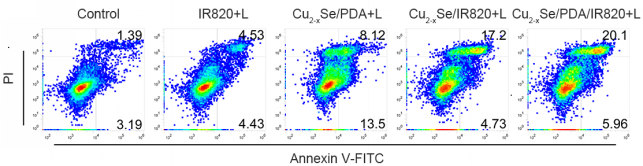


B


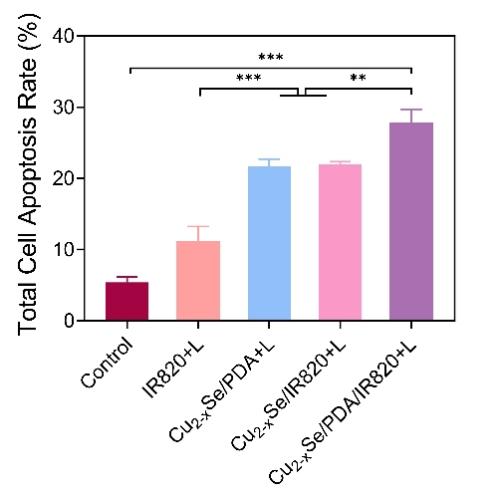


**Figure S19** Flow cytometry analysis of cell apoptosis in IR820+L, Cu2-xSe/PDA+L, and Cu2-xSe/IR820+L, Cu2-xSe/PDA/IR820+L treatment groups (**A**), along with the quantitative analysis of the corresponding results (**B**). (Data are expressed as mean ± SD, n = 3, ***p < 0.001, **p < 0.01.)


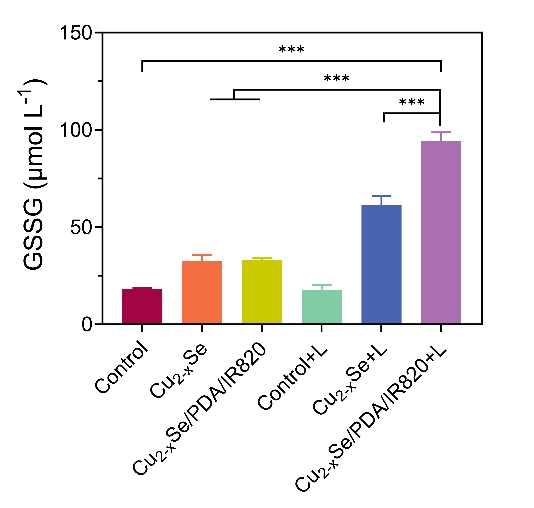


**Figure S20** Intracellular GSSG levels in different treatment groups. (Data are expressed as mean ± SD, n = 3, ***p < 0.001.)

| 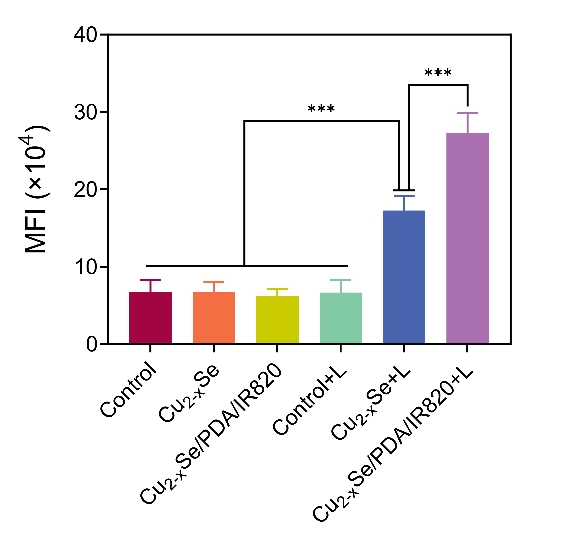 |
| --- |

**Figure S21** Quantitative analysis results of KYSE150 in ROS flow-through after different treatments. Data are expressed as mean ± SD, n = 3, ***p < 0.001.


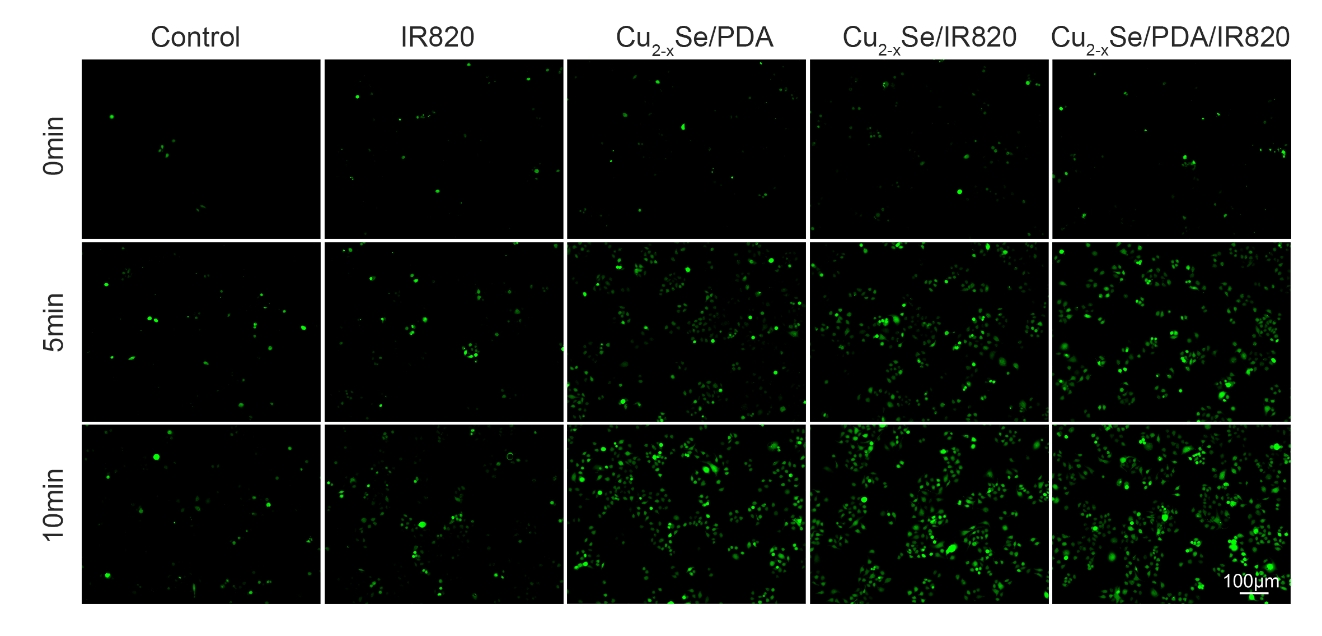


**Figure S22** Time-dependent reactive oxygen species (ROS) generation of IR820, Cu2-xSe/PDA, Cu2-xSe/IR820 and Cu2-xSe/PDA/IR820 under 808 nm laser irradiation. Scale bar = 100 μm.


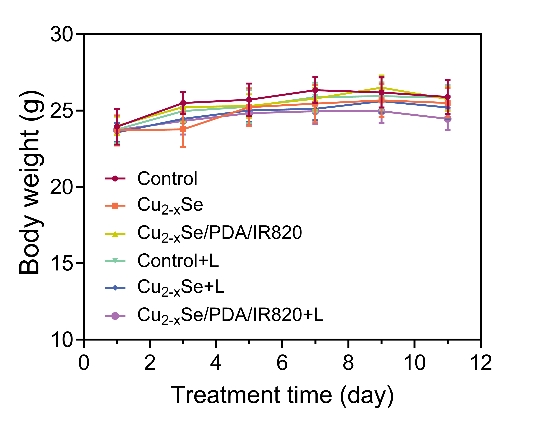


**Figure S23** Mean body weights of mice under different treatment conditions. (Data are expressed as mean ± SD, n = 6.)


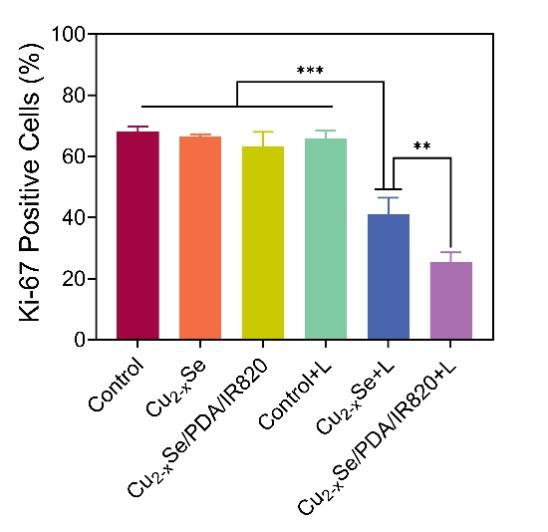


**Figure S24** Percentage of Ki-67 positive cells in all cells under different treatment conditions. (Data are expressed as mean ± SD, n = 6, ***p < 0.001, **p < 0.01.)


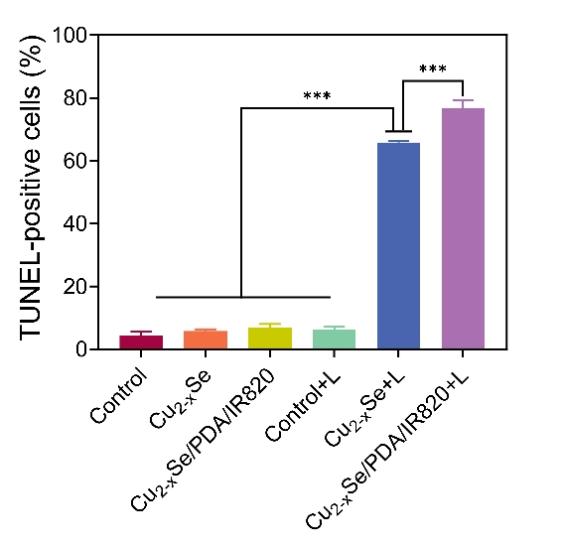


**Figure S25** Percentage of TUNEL-positive cells among all cells in different treatment groups. (Data expressed as mean ± SD, n = 6, ***p < 0.001.)

| A  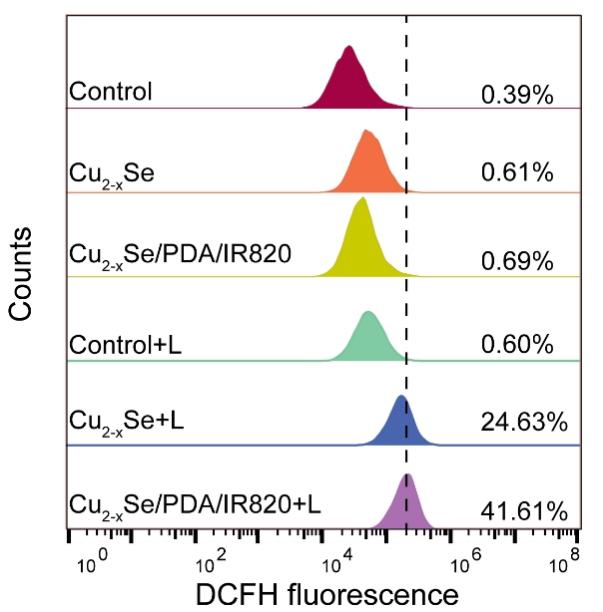 | B  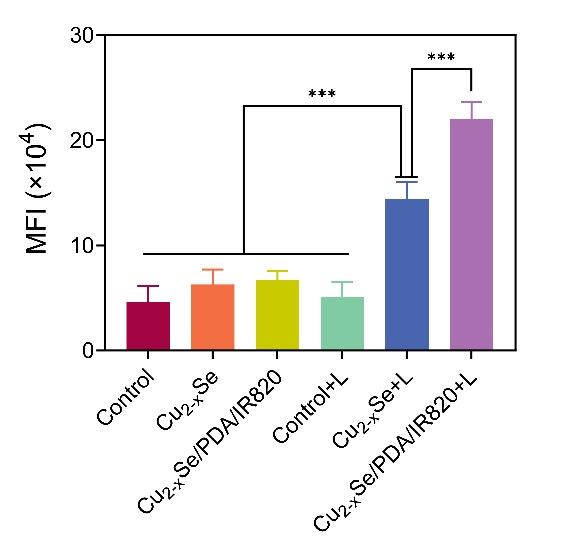 |
| --- | --- |

**Figure S26** ROS levels in tumor tissues of mice in different treatment groups (**A**) and the corresponding quantitative analysis (**B**). (Data are expressed as mean ± SD, n = 6, ***p < 0.001.)


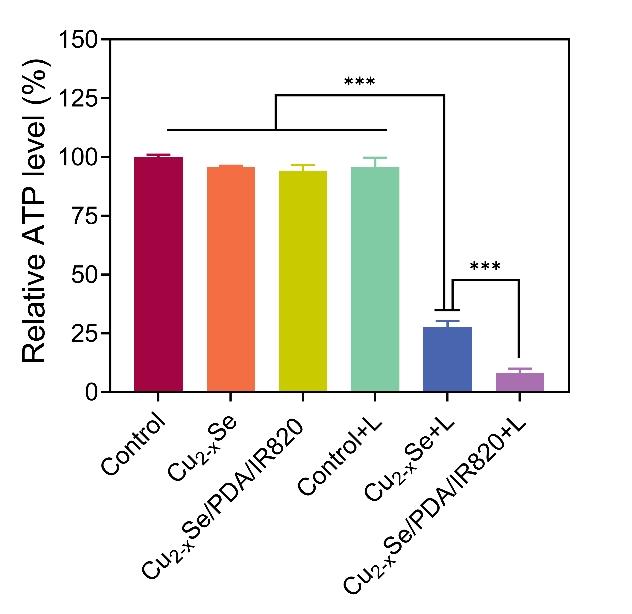


**Figure S27** ATP levels in tumor tissues of mice in different treatment groups. (Data are expressed as mean ± SD, n = 6, ***p < 0.001.)


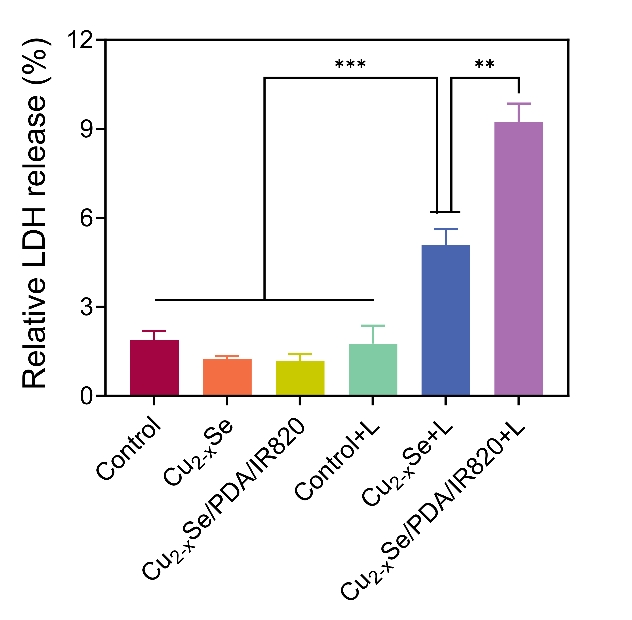


**Figure S28** LDH levels in tumor tissues of mice in different treatment groups. (Data are expressed as mean ± SD, n = 6, ***p < 0.001, **p < 0.01.)


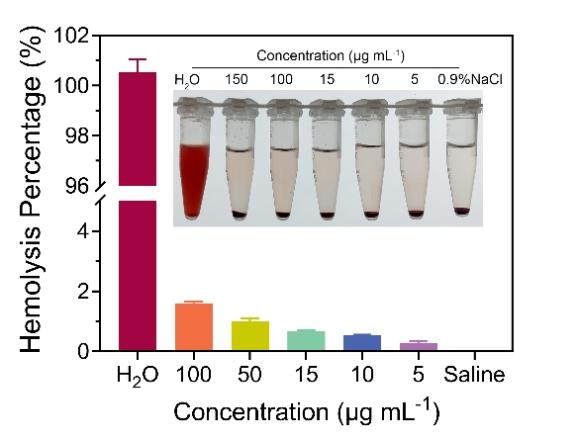


**Figure S29** Percentage hemolysis of erythrocytes by different concentrations of Cu2-xSe/PDA/IR820 composite nanoparticles. (Data expressed as mean ± SD, n = 6.)


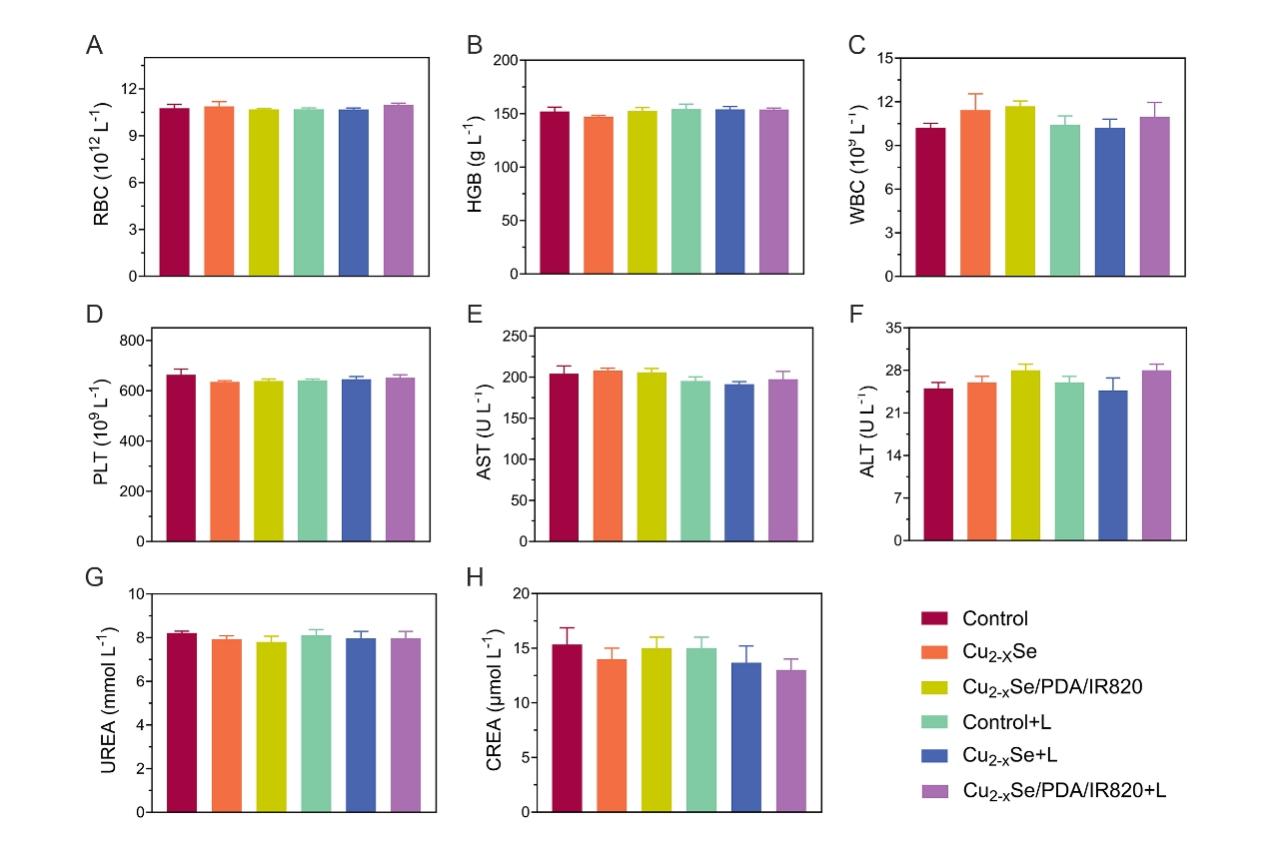


**Figure S30** Hematological parameters of male C57 mice after treatment with saline, Cu2-xSe nanoparticles, and Cu2-xSe/PDA/IR820 composite nanoparticles, with or without laser irradiation, including (**A**) red blood cells (RBC), (**B**) hemoglobin (HGB), (**C**) white blood cells (WBCs), and (**D**) platelets (PLTs). Corresponding blood biochemical indices under different treatment conditions: (**E**) aspartate aminotransferase (AST), (**F**) alanine aminotransferase (ALT), (**G**) urea nitrogen (UREA), and (**H**) creatinine (CREA). (Data are expressed as mean ± SD, n = 6.)


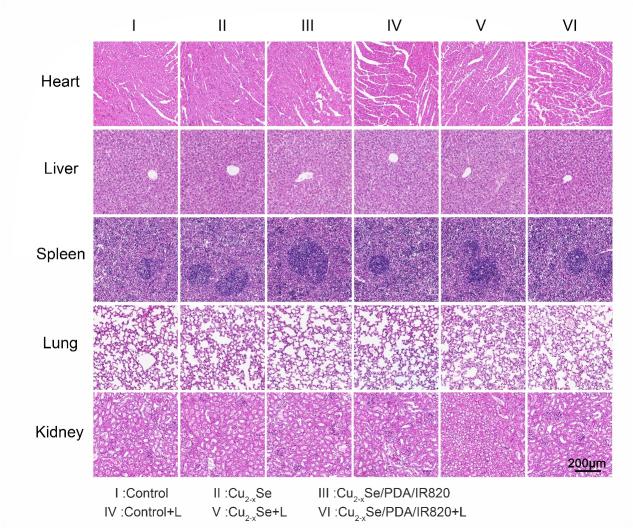


**Figure S31** H&E staining results of various organs in male C57 mice under different treatment conditions. Scale bar = 200 μm. (Data are expressed as mean ± SD, n = 6.)
